# Supplementary material
Source: publisher figshare collection journal article supplement (https://acs.figshare.com/ndownloader/files/24530254)
Supplement: Supplementary file 1 [file 24530254]

## **Supporting Information**

### **Chemo-enzymatic epoxidation of limonene using a novel surface-functionalized silica catalyst derived from agricultural waste**

Harshada M. Salvi and Ganapati D. Yadav\*

Department of Chemical Engineering,

Institute of Chemical Technology, Mumbai - 400019, India

\*Corresponding author E-mail address: [gd.yadav@ictmumbai.edu.in](mailto:gd.yadav@ictmumbai.edu.in)

ORCID ID: 0000-0002-8603-3959

## 1. Analytical method

The progress of the reaction was monitored on GC using Thermo Scientific Trace 1110 equipped with FID detector using TG5 capillary column. The GC method was started at 70 °C with a hold time of 2 min and increased to 140 °C with ramp rate of 15°C/min, further increased to 260 °C with a ramp rate of 17 °C/min. The injector and detector temperature were set at 280 °C, and the carrier gas nitrogen was kept a flow rate of 1 mL/min. The product confirmation was done using GCMS (Thermo Scientific Trace 1300 ISQ LT).

## 2. Arrhenius plot

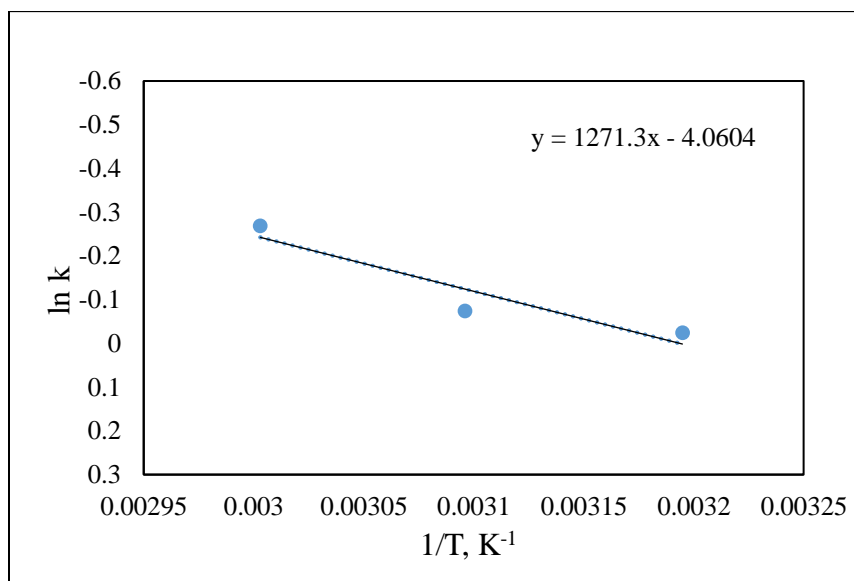

Figure S1. Arrhenius plot

### 3. Parity plot

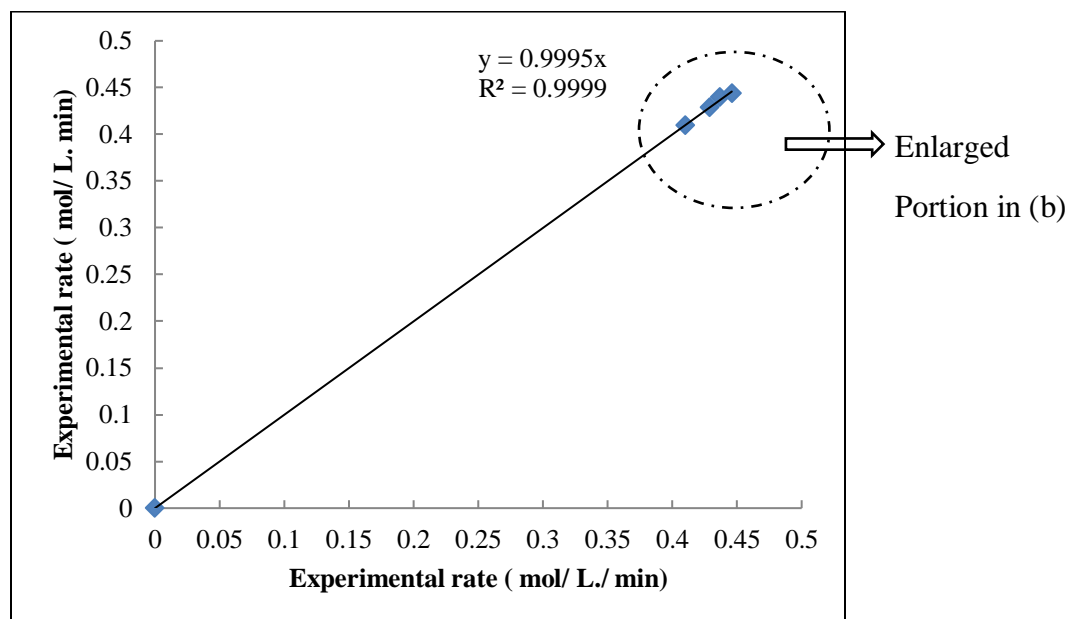

Figure S2. (a) Parity plot of calculated rate vs. experimental rate

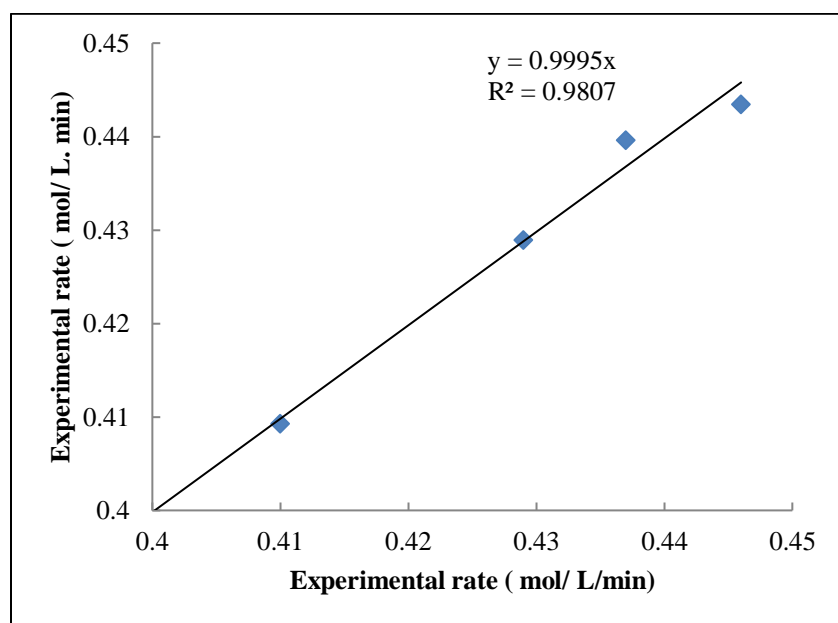

Figure S2. (b) Parity plot of calculated rate vs. experimental rate
